# Supplementary material
Source: MDPI journal article supplement (https://www.mdpi.com/2075-163X/13/11/1374)
Supplement: s1 [file s1]

# Copper-Bearing Magnetite and Delafossite in Copper Smelter Slags

Hassan Gezzaz, Cristiana L. Ciobanu, Nigel J. Cook, Kathy Ehrig, Ashley Slattery, Benjamin Wade and Jie Yao

**Table S1.** Samples and analytical methods.

| Slabs (S) | Crt No. | Section ID | OM | SEM | μXRF | AM | EMPA | FIB-SEM & HAADF STEM |
|-----------|---------|------------|----|-----|------|----|------|----------------------|
| S #1      | 1       | FF21-A     | X  | X   |      |    | X    | X                    |
|           | 2       | FF21-B     | X  | X   | X    | X  | X    | X                    |
|           | 3       | FF21-C     | X  | X   | X    |    |      |                      |
|           | 4       | FF21-D     | X  | X   |      |    |      |                      |
| S #2      | 5       | FF21-2     | X  | X   |      | X  | X    |                      |
| S #3      | 6       | FF21-3A    | X  | X   |      |    | X    |                      |
|           | 7       | FF21-3B    | X  | X   | X    |    | X    |                      |

OM=optical microscopy; SEM=Scanning electron microscopy; μXRF= Micro-X-ray fluorescence; AM= Automated Mineralogy; EPMA=electron probe microanalysis; FIB-SEM=Focused Ion Beam-SEM; HAADF STEM=high-angle annular dark field scanning transmission electron microscopy.

**Table S2.** Modal mineralogy for two sections.

|             | FF21-B |      |       | FF21-B | FF21-2 | Average   |             |             |
|-------------|--------|------|-------|--------|--------|-----------|-------------|-------------|
|             | A      | B    | C     | TOP    |        | 2 samples |             |             |
| Magnetite   | 48.1   | 47.2 | 45.6  | 48.2   | 47.3   | 50.3      | <b>48.8</b> | Magnetite   |
| Copper      | 11.6   | 11.1 | 11.2  | 10.6   | 11.1   | 14.1      | <b>12.6</b> | Copper      |
| Delafossite | 8.6    | 9.1  | 10.5  | 8.7    | 9.2    | 6.7       | <b>8.0</b>  | Delafossite |
| Glass1      | 19.7   | 21.1 | 20.6  | 20.9   | 20.6   | 20.1      | <b>20.3</b> | Glass1      |
| Glass2      | 5.6    | 5.4  | 4.9   | 5.5    | 5.3    | 2.1       | <b>3.7</b>  | Glass2      |
| Cuprite     | 3.6    | 3.2  | 2.9   | 2.5    | 3.1    | 2.8       | <b>2.9</b>  | Cuprite     |
| SiO2        | 1      | 0.7  | 1.2   | 1      | 1.0    | 1.1       | <b>1.0</b>  | SiO2        |
| Others      | 1.84   | 2.18 | 3.12  | 2.6    | 2.4    | 2.8       | <b>2.6</b>  | Others      |
|             | 100    | 100  | 99.99 | 100    | 100    | 100       | <b>100</b>  |             |
